# Supplementary material for: Near-Collapse Buildings and Unsafe Sidewalks as Neglected Urban & Public Health Issue: A Qualitative Study
Source: MDPI journal article supplement (doi:10.3390/urbansci5020047), 2021-06-07
Supplement: s1 [file s1]

**Supplementary Table S4. Statistics for falls on the same level in Greece, 2013.**

| TYPE OF INJURY                                                   | TOTAL | ATHENS |
|------------------------------------------------------------------|-------|--------|
| W01 — Falling to the same level from slipping<br>or stumbling    | 1043  | 84     |
| W10 — Falling on or from stairs (stairs)                         | 183   | 32     |
| W12 — Falling on or out of scaffolding                           | 26    | 3      |
| W13 — Falling from, outside, or through a<br>building or edifice | 99    | 16     |
| W18 — Another fall on the same level                             | 187   | 19     |
| W19 — Unspecified fall                                           | 734   | 339    |
