# Supplementary material for: Near-Collapse Buildings and Unsafe Sidewalks as Neglected Urban & Public Health Issue: A Qualitative Study
Source: MDPI journal article supplement (doi:10.3390/urbansci5020047), 2021-06-07
Supplement: s1 [file s1]

Archive with 7 entries (6 files):
- urbansci-1193291-supplementary/
- urbansci-1193291-supplementary/Mentis - Papadopoulos. Supplementary File 1. International databases and their key features.pdf
- urbansci-1193291-supplementary/Mentis - Papadopoulos. Supplementary Table 1.pdf
- urbansci-1193291-supplementary/Mentis - Papadopoulos. Supplementary Table 2.pdf
- urbansci-1193291-supplementary/Mentis - Papadopoulos. Supplementary Table 3.pdf
- urbansci-1193291-supplementary/Mentis - Papadopoulos. Supplementary Table 4.pdf
- urbansci-1193291-supplementary/Mentis - Papadopoulos. Supplementary Table 5.pdf
