# Supplementary material for: Near-Collapse Buildings and Unsafe Sidewalks as Neglected Urban & Public Health Issue: A Qualitative Study
Source: MDPI journal article supplement (doi:10.3390/urbansci5020047), 2021-06-07
Supplement: s1 [file s1 › urbansci-1193291-supplementary/Mentis - Papadopoulos. Supplementary Table 1.pdf]

**Supplementary Table S1. ICD-9 and ICD-10 codes for accidents and injuries caused to persons from falling of buildings (1.a.), from falling off buildings (1.b), and from falls on the same level (1.c).**

**1. a. ICD-9 and ICD-10 codes for accidents and injuries caused to persons from falling of buildings**

| <b>ICD-9 (2015) – Code Description</b>                                                                   |
|----------------------------------------------------------------------------------------------------------|
| <b>E016.9</b> Other activity involving property and land maintenance, building and construction          |
| <b>E884.9</b> Other accidental fall from one level to another                                            |
| <b>E916</b> Struck accidentally by falling object                                                        |
| <b>E987.0</b> Falling from residential premises undetermined whether accidentally or purposely inflicted |
| <b>E987.1</b> Falling from other man-made structures, undetermined whether accidentally or purposely     |
| <b>ICD-10 (2019) – Code Description</b>                                                                  |
| <b>W17.89x</b> Other fall from one level to another                                                      |
| <b>W20.0x</b> Struck by falling object in cave-in                                                        |
| <b>W20.1x</b> Struck by object due to collapse of building                                               |
| <b>W20.8x</b> Other cause of strike by thrown, projected or falling object                               |
| <b>Y30.x</b> Falling, jumping or pushed from a high place, undetermined intent                           |

**1.b. ICD-9 and ICD-10 codes for accidents and injuries caused to persons from falling off buildings**

| <b>ICD-9 (2015) – Code Description</b>                                         |
|--------------------------------------------------------------------------------|
| <b>E882</b> Accidental fall from or out of building or other structure         |
| <b>E849.3</b> Accidents occurring in industrial places and premises            |
| <b>E849.0</b> Home accidents                                                   |
| <b>E849.5</b> Street and highway accidents                                     |
| <b>E849.6</b> Accidents occurring in public building                           |
| <b>E849.7</b> Accidents occurring in residential institution                   |
| <b>E849.8</b> Accidents occurring in other specified places                    |
| <b>E849.9</b> Accidents occurring in unspecified place                         |
| <b>E849.1</b> Farm accidents                                                   |
| <b>E016.2</b> Activities involving building and construction                   |
| <b>ICD-10 (2019) – Code Description</b>                                        |
| <b>W13.0XXx</b> Fall from, out of or through balcony                           |
| <b>W13.1XXx</b> Fall from, out of or through bridge                            |
| <b>W13.2XXx</b> Fall from, out of or through roof                              |
| <b>W13.3XXx</b> Fall through floor                                             |
| <b>W13.4XXx</b> Fall from, out of or through window                            |
| <b>W13.8XXx</b> Fall from, out of or through other building or structure       |
| <b>W13.9XXx</b> Fall from, out of or through building, not otherwise specified |
| <b>W12.XXXx</b> Fall on and from scaffolding                                   |
| <b>W19.XXXx</b> Unspecified fall                                               |

---

**Y92.69** Other specified industrial and construction area as the place of occurrence of the external cause

**Y92.099** Unspecified place in other non-institutional residence as the place of occurrence of the external cause

**Y92.410** Unspecified street and highway as the place of occurrence of the external cause

**Y92.29** Other specified public building as the place of occurrence of the external cause

**Y92.199** Unspecified place in other specified residential institution as the place of occurrence of the external cause

**Y92.89** Other specified places as the place of occurrence of the external cause

**Y92.9** Unspecified place or not applicable

**Y92.79** Other farm location as the place of occurrence of the external cause

**Y93.H3** Activity, building, and construction

---

**1.c. ICD-9 and ICD-10 codes for accidents and injuries caused to persons from falls on the same level (\*) (#)**

---

**ICD-9 (2015) – Code Description**

---

**E880.1** Accidental fall on or from sidewalk curb

**E885.9** Fall from other slipping, tripping, or stumbling

**E888.9** Unspecified fall

**E001.0** Activities involving walking, marching and hiking

**E929.3** Late effects of accidental fall

**E888.8** Other fall

**E886.9** Other and unspecified falls on same level from collision, pushing, or shoving, by or with other person

**E928.9** Unspecified accident

**E929.9** Late effects of unspecified accident

**E880.9** Accidental fall on or from other stairs or steps

**E929.8** Late effects of other accidents

**E016.2** Activities involving building and construction

**E030** Unspecified activity

---

**ICD-10 (2019) – Code Description**

---

**W01.0XXx** Fall on same level from slipping, tripping and stumbling without subsequent striking against object

**W01.10Xx** Fall on same level from slipping, tripping and stumbling with subsequent striking against unspecified object

**W01.110x** Fall on same level from slipping, tripping and stumbling with subsequent striking against sharp glass

**W01.111x** Fall on same level from slipping, tripping and stumbling with subsequent striking against power tool or machine

**W01.118x** Fall on same level from slipping, tripping and stumbling with subsequent striking against other sharp object

**W01.119x** Fall on same level from slipping, tripping and stumbling with subsequent striking against unspecified sharp object

**W01.198x** Fall on same level from slipping, tripping and stumbling with subsequent striking against other object

**W18.30Xx** Fall on same level, unspecified

---

---

|                  |                                                                                            |
|------------------|--------------------------------------------------------------------------------------------|
| <b>W18.31Xx</b>  | Fall on same level due to stepping on an object                                            |
| <b>W18.39Xx</b>  | Other fall on same level                                                                   |
| <b>W10.1XXx</b>  | Fall (on)(from) sidewalk curb                                                              |
| <b>W10.2XXx</b>  | Fall (on)(from) incline                                                                    |
| <b>W10.8XXx</b>  | Fall (on) (from) other stairs and steps                                                    |
| <b>W10.9XXx</b>  | Fall (on) (from) unspecified stairs and steps                                              |
| <b>W18.00Xx</b>  | Striking against unspecified object with subsequent fall                                   |
| <b>W18.02Xx</b>  | Striking against glass with subsequent fall                                                |
| <b>W18.09Xx</b>  | Striking against other object with subsequent fall                                         |
| <b>W18.40Xx</b>  | Slipping, tripping and stumbling without falling, unspecified                              |
| <b>W18.41Xx</b>  | Slipping, tripping and stumbling without falling due to stepping on object                 |
| <b>W18.42Xx</b>  | Slipping, tripping and stumbling without falling due to stepping into hole or opening      |
| <b>W18.43Xx</b>  | Slipping, tripping and stumbling without falling due to stepping from one level to another |
| <b>W18.49Xx</b>  | Other slipping, tripping and stumbling without falling                                     |
| <b>W19.XXXx</b>  | Unspecified fall                                                                           |
| <b>Y93.01</b>    | Activity walking, marching, and hiking                                                     |
| <b>Y93.02</b>    | Activity, running                                                                          |
| <b>Y93.9</b>     | Activity, unspecified                                                                      |
| <b>V00.0xxXx</b> | Pedestrian on foot injured in collision with pedestrian conveyance                         |
| <b>V00.8xxxx</b> | Accident on other pedestrian conveyance                                                    |
| <b>W99.XXXx</b>  | Exposure to other man-made environmental factors                                           |

---

(\*) ICD-9 and ICD-10s ordered by subjective best match (billable codes only)

(#) X is the standard ICD-10 naming mechanism. However, lower case x represents an aggregation of multiple codes. For instance, W19.XXXx includes W19.XXXA, W19.XXXD, and W19.XXXS, where A = “initial encounter”, D = “subsequent encounter”, and S = “sequela”.
