# Supplementary material for: Near-Collapse Buildings and Unsafe Sidewalks as Neglected Urban & Public Health Issue: A Qualitative Study
Source: MDPI journal article supplement (doi:10.3390/urbansci5020047), 2021-06-07
Supplement: s1 [file s1 › urbansci-1193291-supplementary/Mentis - Papadopoulos. Supplementary Table 2.pdf]

**Supplementary Table S2. Statistics on neck femoral bone (including hip fractures) (Code 473), 2004–2012, Greece.**

| YEAR | TOTAL | ATHENS REGION |
|------|-------|---------------|
| 2004 | 18224 | 5000          |
| 2005 | 19096 | 5520          |
| 2006 | 20081 | 5720          |
| 2007 | 20252 | 5592          |
| 2008 | 21194 | 5600          |
| 2009 | 22583 | 5872          |
| 2010 | 22466 | 6080          |
| 2011 | 22784 | 6304          |
| 2012 | 19792 | 4680          |
