# Supplementary material for: Near-Collapse Buildings and Unsafe Sidewalks as Neglected Urban & Public Health Issue: A Qualitative Study
Source: MDPI journal article supplement (doi:10.3390/urbansci5020047), 2021-06-07
Supplement: s1 [file s1 › urbansci-1193291-supplementary/Mentis - Papadopoulos. Supplementary Table 3.pdf]

**Supplementary Table S3. Statistics on fractures in the hip and neck area (S70, S71, S72, S73 codes), 2013, Greece.**

| TYPE OF INJURY                                         | TOTAL | ATHENS REGION |
|--------------------------------------------------------|-------|---------------|
| Hip rupture                                            | 272   | 47            |
| Rupture of femoral bone                                | 84    | 16            |
| Open injury of other parts of the pelvic zone          | 3     | 1             |
| Open hip injury                                        | 13    | 2             |
| Open hip and femoral bone injury                       | 14    | 4             |
| Open hip injury                                        | 102   | 14            |
| Fracture of femoral bulge                              | 1295  | 337           |
| Fracture of the neck of the femur                      | 7282  | 2458          |
| Fracture of the lower extremity of the femur           | 660   | 189           |
| Hip fracture                                           | 1,564 | 282           |
| Hip fracture, non-determined region                    | 235   | 70            |
| Fractures of other parts of hip bone                   | 283   | 57            |
| Peripheral fracture                                    | 9151  | 2570          |
| Multiple fractures of hip bone                         | 34    | 9             |
| Subclinical fracture                                   | 1113  | 297           |
| Hip sprain                                             | 34    | 10            |
| Dislocation and rupture of the hip joint and ligaments | 60    | 8             |
| Hip dislocation                                        | 530   | 125           |
