# Supplementary material for: Near-Collapse Buildings and Unsafe Sidewalks as Neglected Urban & Public Health Issue: A Qualitative Study
Source: MDPI journal article supplement (doi:10.3390/urbansci5020047), 2021-06-07
Supplement: s1 [file s1 › urbansci-1193291-supplementary/Mentis - Papadopoulos. Supplementary Table 5.pdf]

**Supplementary Table S5. Suggestive policies and measures to be conducted by the Municipal authorities.**

- 
- Assess all the facades of apartment buildings in the metropolitan region, following official notification to the buildings' managers to take appropriate, guided measures to fix any related problems
  - ISO standardize sidewalk construction, in terms of construction methods and materials applied
  - Provide paling of sidewalks around trees
  - Ban parking over sidewalks
  - Record near-collapse apartment buildings following written notice to the owners (determined from public tax office records) and, otherwise, demolish them using appropriate steps (notably, dissemination of *Aspergillus* species from old buildings can create problems to immunocompromised or immunosuppressed people within a 0.5-km radius)
  - Restore existing, preservable buildings in an energy-efficient way
  - Promote efforts to record and assess the 19<sup>th</sup>- and 20<sup>th</sup>-century buildings in Athens through governmental or non-governmental organizations
  - Implement legislation for restructuring near-collapse buildings, and, in turn, increase green areas from 1 m<sup>2</sup> per citizen in Athens to 30 m<sup>2</sup> per citizen (as in other European countries)
  - Assess whether near-collapse, abandoned buildings affect a region's real-estate values, e.g., through hedonic price regression models
  - Apply measures obliging for one TV antenna per apartment building with standard fastening
  - Ecologically and harmlessly remove old antennas (with an imposed deadline of six-months) through upcycling, ensuring that antennas are not abandoned in common garbage (as they are often collected by Roma populations or homeless refugees, thus exposing them to heavy metals and associated health issues)
-
